# Supplementary material
Source: publisher figshare collection journal article supplement (https://acs.figshare.com/ndownloader/files/10206495)
Supplement: Supplementary file 1 [file 10206495]

## **Supporting Information**

### **Composites of Layered $M(\text{HPO}_4)_2$ ( $M = \text{Zr}$ , $\text{Sn}$ , and $\text{Ti}$ ) with Reduced Graphene Oxide as Anode Materials for Lithium Ion Batteries**

Mei Ma, Shouwu Guo\* Wenzhuo Shen\*

Department of Electronic Engineering, School of Electronic Information and Electrical Engineering, Shanghai Jiao Tong University, Shanghai 200240, P.R. China

Correspondence should be addressed to: [swguo@sjtu.edu.cn](mailto:swguo@sjtu.edu.cn) or [shenwenzhuo@sjtu.edu.cn](mailto:shenwenzhuo@sjtu.edu.cn)

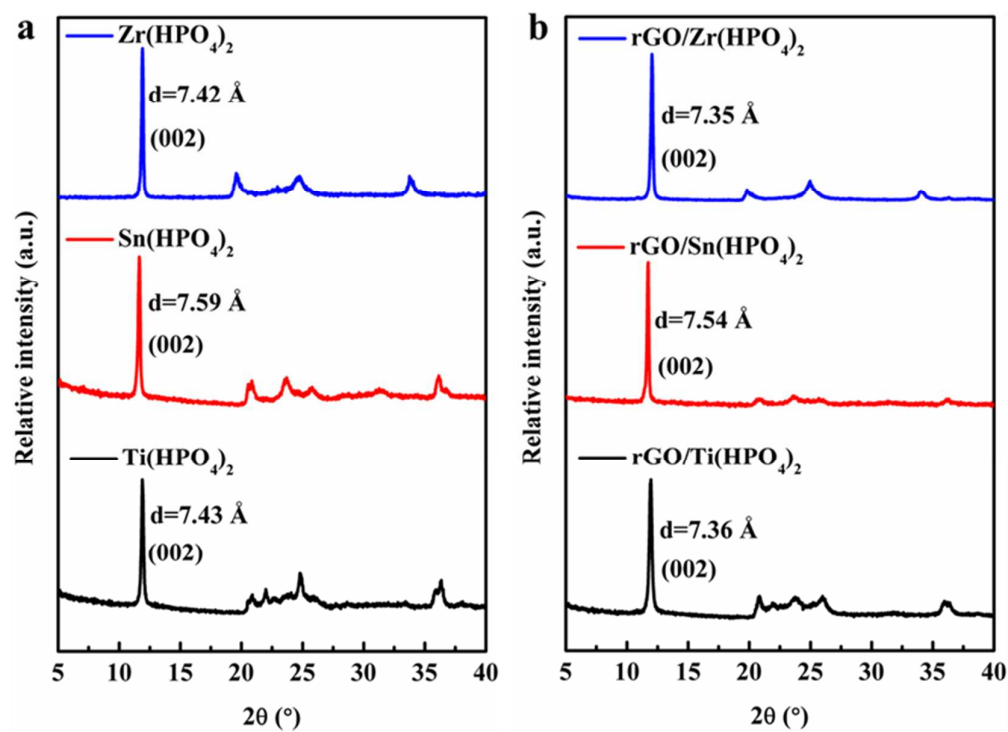

**Figure S1.** XRD patterns of (a)  $M(\text{HPO}_4)_2$ , and (b)  $\text{rGO}/M(\text{HPO}_4)_2$  with  $\text{rGO}$ -to- $M(\text{HPO}_4)_2$  ratio of 5:100 (in weight). The interlayer d-spacings of the materials are labeled in the Figure.

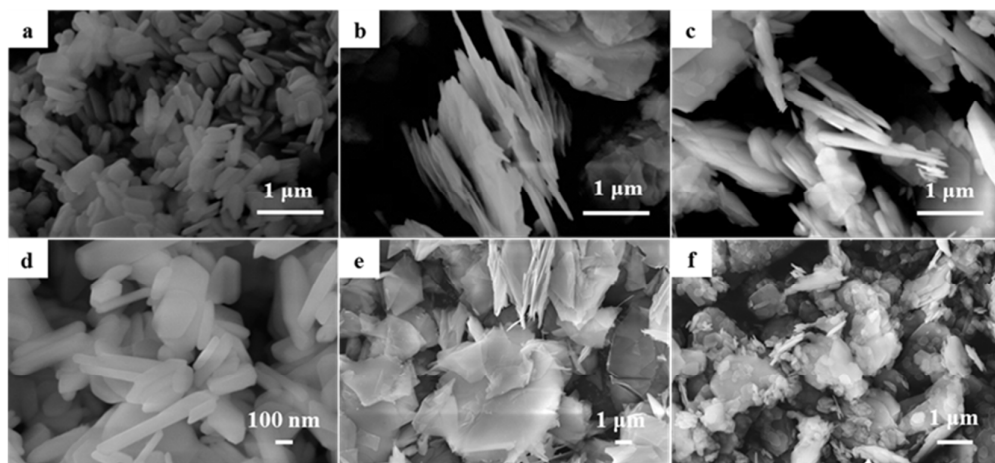

**Figure S2.** FE-SEM images of metal phosphates hydrates before and after dehydration, (a)  $\text{Zr}(\text{HPO}_4)_2 \cdot \text{H}_2\text{O}$ , (b)  $\text{Sn}(\text{HPO}_4)_2 \cdot \text{H}_2\text{O}$ , (c)  $\text{Ti}(\text{HPO}_4)_2 \cdot \text{H}_2\text{O}$ , (d)  $\text{Zr}(\text{HPO}_4)_2$ , (e)  $\text{Sn}(\text{HPO}_4)_2$ , and (f)  $\text{Ti}(\text{HPO}_4)_2$ , revealing that all three metal phosphates have similar thin flake morphology with the thickness ranged in nanometers and lateral dimensions over a few micrometers.

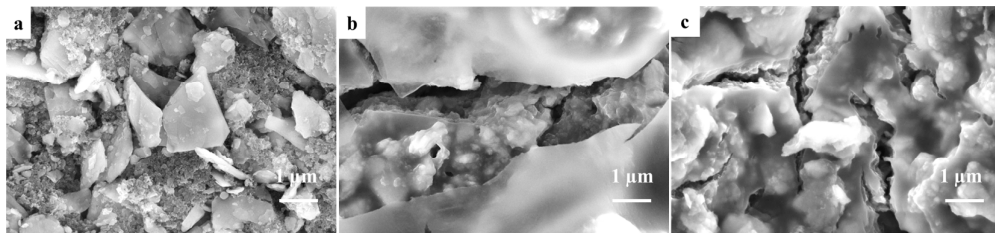

**Figure S3.** FE-SEM images of the electrodes using rGO/Sn(HPO<sub>4</sub>)<sub>2</sub> composites with rGO-to-Sn(HPO<sub>4</sub>)<sub>2</sub>·H<sub>2</sub>O ratio of 5:100 (in weight) at different charge-discharge states. (a) without charge-discharge process, (b) after 1000 charge-discharge cycles at 1 A g<sup>-1</sup> and (c) after 1000 charge-discharge at 5 A g<sup>-1</sup>.

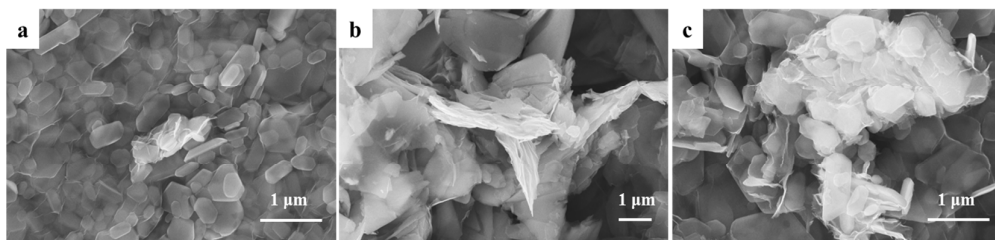

**Figure S4.** FE-SEM images of (a) rGO/Zr(HPO<sub>4</sub>)<sub>2</sub> composite with rGO-to-Zr(HPO<sub>4</sub>)<sub>2</sub> ratio of 20:100 (in weight), (b) rGO/Sn(HPO<sub>4</sub>)<sub>2</sub> composite with rGO-to-Sn(HPO<sub>4</sub>)<sub>2</sub> ratio of 10:100 (in weight), and (c) rGO/Ti(HPO<sub>4</sub>)<sub>2</sub> composite with rGO-to-Ti(HPO<sub>4</sub>)<sub>2</sub> ratio of 20:100 (in weight).

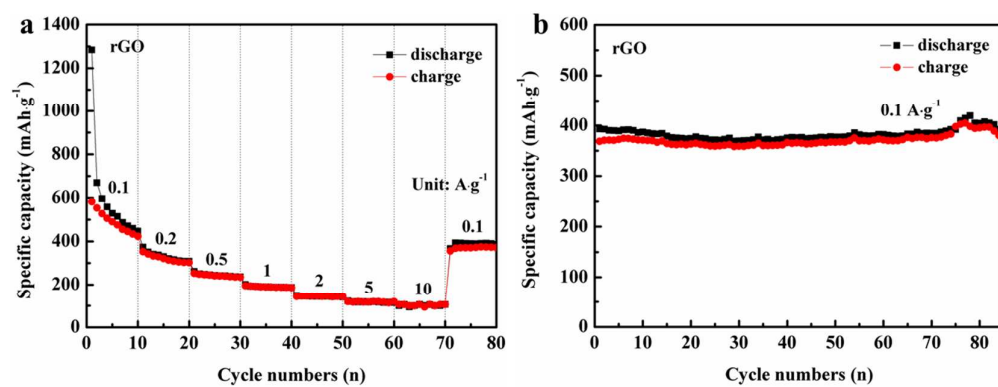

**Figure S5.** (a) Galvanostatic charge-discharge curves of bare rGO as anode material for LIBs, measured at current densities from 0.1 to 10 A g<sup>-1</sup>; (b) Cycling performance of rGO anode at 0.1 A g<sup>-1</sup>.
